# Supplementary material for: Construction and external validation of a 5-gene random forest model to diagnose non-obstructive azoospermia based on the single-cell RNA sequencing of testicular tissue
Source: publisher site journal article supplement (doi:10.18632/aging.203675), 2021-11-04
Supplement: Supplementary file [file aging-v13i21-203675-supplementary-material-SD1.pdf]

SUPPLEMENTARY FIGURE

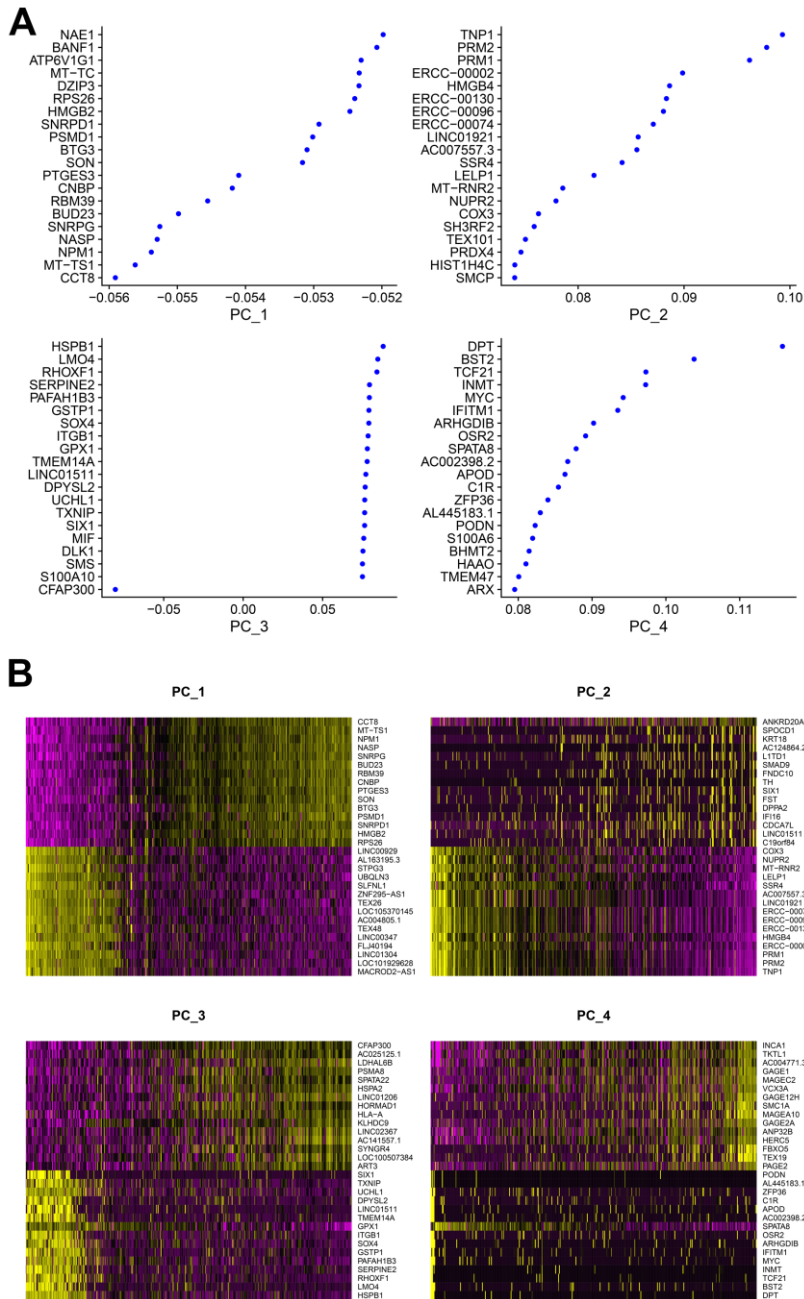

**Supplementary Figure 1. The top 4 components and the correlated genes in PCA analysis. (A)** The Top related genes to each principal component. **(B)** The heatmap indicating the expression level of the Top related genes. The colors ranging from purple to yellow represented the expression values from low to high.
