# Supplementary material for: Construction and external validation of a 5-gene random forest model to diagnose non-obstructive azoospermia based on the single-cell RNA sequencing of testicular tissue
Source: publisher site journal article supplement (doi:10.18632/aging.203675), 2021-11-04
Supplement: Supplementary file [file aging-v13i21-203675-supplementary-material-SD3.pdf]

## SUPPLEMENTARY TABLE

**Supplementary Table 2. The analysis of the PPI network.**

| node_name | MCC | DMNC    | MNC | Degree | EPC   | BottleNeck | EcCentricity | Closeness | Radiality | Betweenness | Stress | ClusteringCoefficient |
|-----------|-----|---------|-----|--------|-------|------------|--------------|-----------|-----------|-------------|--------|-----------------------|
| UGT1A10   | 1   | 0       | 1   | 1      | 1.429 | 1          | 0.06667      | 1         | 0.2       | 0           | 0      | 0                     |
| UGT1A1    | 1   | 0       | 1   | 1      | 1.429 | 1          | 0.06667      | 1         | 0.2       | 0           | 0      | 0                     |
| RPL36A    | 6   | 0.46346 | 3   | 3      | 4.331 | 1          | 0.12         | 7.05      | 1.87059   | 0           | 0      | 1                     |
| RPL39     | 6   | 0.46346 | 3   | 3      | 4.291 | 1          | 0.12         | 7.05      | 1.87059   | 0           | 0      | 1                     |
| RPL10     | 6   | 0.46346 | 3   | 3      | 4.346 | 1          | 0.12         | 7.05      | 1.87059   | 0           | 0      | 1                     |
| PRKCE     | 1   | 0       | 1   | 1      | 1.403 | 1          | 0.06667      | 1         | 0.2       | 0           | 0      | 0                     |
| PPP1CA    | 1   | 0       | 1   | 1      | 1.403 | 1          | 0.06667      | 1         | 0.2       | 0           | 0      | 0                     |
| LIN7B     | 1   | 0       | 1   | 1      | 1.747 | 1          | 0.06667      | 2         | 0.31111   | 0           | 0      | 0                     |
| HIP1      | 1   | 0       | 1   | 1      | 1.796 | 1          | 0.06667      | 2         | 0.31111   | 0           | 0      | 0                     |
| HIF1A     | 1   | 0       | 1   | 1      | 3.412 | 1          | 0.15         | 6.75      | 2.11765   | 0           | 0      | 0                     |
| PRIM1     | 1   | 0       | 1   | 1      | 3.035 | 1          | 0.12         | 6.35      | 1.87059   | 0           | 0      | 0                     |
| CLSPN     | 1   | 0       | 1   | 1      | 3.082 | 1          | 0.12         | 6.35      | 1.87059   | 0           | 0      | 0                     |
| GINS2     | 1   | 0       | 1   | 1      | 3.034 | 1          | 0.12         | 6.35      | 1.87059   | 0           | 0      | 0                     |
| FBXO5     | 2   | 0.30779 | 2   | 2      | 4.677 | 1          | 0.15         | 7.91667   | 2.29412   | 0           | 0      | 1                     |
| ESCO2     | 1   | 0       | 1   | 1      | 3.147 | 1          | 0.12         | 6.35      | 1.87059   | 0           | 0      | 0                     |
| CDC6      | 6   | 0.30779 | 2   | 6      | 5.521 | 5          | 0.15         | 9.91667   | 2.43529   | 116         | 116    | 0.06667               |
| ITGB1     | 1   | 0       | 1   | 1      | 1.449 | 1          | 0.06667      | 1         | 0.2       | 0           | 0      | 0                     |
| CD9       | 1   | 0       | 1   | 1      | 1.449 | 1          | 0.06667      | 1         | 0.2       | 0           | 0      | 0                     |
| RPS4X     | 7   | 0.46346 | 3   | 4      | 5.06  | 4          | 0.15         | 9         | 2.36471   | 84          | 84     | 0.5                   |
| TUBA8     | 2   | 0.30779 | 2   | 2      | 4.384 | 1          | 0.15         | 7.5       | 2.18824   | 0           | 0      | 1                     |
| RGS6      | 1   | 0       | 1   | 1      | 3.558 | 1          | 0.15         | 7         | 2.15294   | 0           | 0      | 0                     |
| PDCL3     | 1   | 0       | 1   | 1      | 3.37  | 1          | 0.15         | 7         | 2.15294   | 0           | 0      | 0                     |
| TUBA4A    | 2   | 0.30779 | 2   | 2      | 4.562 | 1          | 0.15         | 7.5       | 2.18824   | 0           | 0      | 1                     |
| CCT8      | 7   | 0.30779 | 2   | 7      | 6.502 | 18         | 0.2          | 11.33333  | 2.71765   | 186         | 186    | 0.09524               |
| PSMD1     | 5   | 0.30779 | 2   | 5      | 6.164 | 18         | 0.2          | 10.5      | 2.68235   | 152         | 152    | 0.2                   |
| BPI       | 2   | 0.30779 | 2   | 2      | 4.974 | 1          | 0.2          | 8.33333   | 2.43529   | 0           | 0      | 1                     |
| CHGB      | 1   | 0       | 1   | 1      | 1.43  | 1          | 0.06667      | 1         | 0.2       | 0           | 0      | 0                     |
| APLP2     | 1   | 0       | 1   | 1      | 1.43  | 1          | 0.06667      | 1         | 0.2       | 0           | 0      | 0                     |
| VAMP2     | 3   | 0       | 1   | 3      | 2.248 | 4          | 0.13333      | 3         | 0.4       | 6           | 6      | 0                     |
| AP1S2     | 1   | 0       | 1   | 1      | 1.747 | 1          | 0.06667      | 2         | 0.31111   | 0           | 0      | 0                     |
