# Supplementary material for: Construction and external validation of a 5-gene random forest model to diagnose non-obstructive azoospermia based on the single-cell RNA sequencing of testicular tissue
Source: Aging (Albany NY). 2021 Nov 4;13(21):24219–35. doi: 10.18632/aging.203675 (PMC8610122; doi:10.18632/aging.203675)
Supplement: Supplementary Table 1 [file aging-13-203675-s002.xls]

## Sheet: 03.clusterMarkers
Supplementary Table 1. The cells markers of the cell clusters.
p_val	avg_log2FC	pct.1	pct.2	p_val_adj	cluster	gene
1.4173e-38	0.831537	0.94	0.775	4.54954e-34	0	LINC01120
3.18777e-43	1.13056	0.978	0.638	1.02327e-38	1	HSPB1
5.56829e-40	0.922995	0.989	0.641	1.78742e-35	1	SLC25A5
1.00375e-38	0.895918	1	0.761	3.22205e-34	1	RPL10
4.1457e-38	0.934669	0.978	0.621	1.33077e-33	1	LDHB
2.6212e-37	0.977196	0.955	0.589	8.41406e-33	1	UCHL1
3.91291e-37	0.852883	0.989	0.773	1.25604e-32	1	RPL36A-HNRNPH2
4.2072e-37	0.849292	0.989	0.77	1.35051e-32	1	RPL36A
1.98865e-36	0.893891	0.966	0.668	6.38357e-32	1	RPL39
1.24954e-35	0.902713	0.899	0.379	4.01103e-31	1	ATIC
2.34908e-35	0.998734	0.899	0.437	7.54055e-31	1	GSTP1
5.66319e-35	0.835038	0.989	0.749	1.81788e-30	1	RBM3
1.39227e-33	0.825563	0.989	0.671	4.4692e-29	1	AC040977.2
1.73849e-33	0.97164	0.91	0.496	5.58054e-29	1	TXNIP
4.49037e-33	0.880738	0.966	0.679	1.44141e-28	1	EGFL7
1.50704e-32	1.04117	0.91	0.592	4.83761e-28	1	SOX4
3.20705e-32	1.01312	0.888	0.534	1.02946e-27	1	RHOXF1
3.27128e-32	1.02491	0.876	0.446	1.05008e-27	1	SMS
3.33171e-32	0.960064	0.933	0.688	1.06948e-27	1	PAFAH1B3
1.10976e-31	0.926579	0.876	0.429	3.56234e-27	1	SERPINE2
1.20332e-31	0.925286	0.899	0.49	3.86266e-27	1	ITGB1
1.76864e-31	0.886743	0.91	0.478	5.67732e-27	1	DLK1
8.69562e-31	0.90594	0.775	0.265	2.79129e-26	1	LMO4
1.28097e-30	0.864856	0.854	0.356	4.1119e-26	1	SIGIRR
2.0987e-30	0.871723	0.876	0.458	6.73683e-26	1	PPP1CA
5.03543e-30	0.83578	0.865	0.466	1.61637e-25	1	PDCL3
2.14266e-29	0.910643	0.831	0.379	6.87793e-25	1	CDCA7L
6.57222e-29	0.817912	0.933	0.767	2.10968e-24	1	RPS4X
1.51188e-28	0.884736	0.798	0.338	4.85312e-24	1	TMEM14A
2.75442e-28	0.840149	0.764	0.277	8.8417e-24	1	TLE1
9.38035e-28	0.819863	0.753	0.274	3.01109e-23	1	LY6E
1.60512e-27	0.88535	0.787	0.303	5.15243e-23	1	DPYSL2
2.76495e-27	0.845033	0.82	0.338	8.87549e-23	1	RBMX2
3.38889e-27	0.807353	0.91	0.633	1.08783e-22	1	NME2
3.07582e-26	0.801285	0.91	0.58	9.87339e-22	1	CD99
1.96417e-25	0.80746	0.809	0.408	6.30498e-21	1	RABGGTA
1.39465e-24	0.859954	0.798	0.402	4.47684e-20	1	CD9
3.42603e-24	0.827984	0.753	0.332	1.09975e-19	1	QDPR
4.43664e-24	0.815721	0.843	0.519	1.42416e-19	1	LIN7B
1.29136e-22	0.818664	0.787	0.429	4.14527e-18	1	SMARCA1
2.26202e-53	0.840495	0.898	0.14	7.26107e-49	2	AC104964.1
1.18069e-47	1.03263	0.92	0.253	3.79e-43	2	MIR1909
7.78327e-46	0.944906	0.909	0.267	2.49843e-41	2	LINC00906
1.41937e-45	0.951296	1	0.869	4.55617e-41	2	AKNAD1
3.60681e-44	0.883129	1	0.86	1.15779e-39	2	SPEM1
7.20096e-44	0.867473	1	0.68	2.31151e-39	2	AL645465.1
8.10687e-44	1.03425	0.989	0.628	2.60231e-39	2	AL589765.4
2.10287e-43	1.02428	0.955	0.424	6.75022e-39	2	OXCT2
2.46409e-43	0.810482	1	0.936	7.90974e-39	2	SPATA42
2.82837e-43	0.802649	1	0.834	9.07908e-39	2	MFAP3L
2.87606e-43	0.832996	1	0.887	9.23216e-39	2	LEMD1
3.49712e-43	0.866325	0.875	0.206	1.12258e-38	2	CCDC187
3.68989e-43	0.88957	1	0.858	1.18446e-38	2	CCDC196
3.86382e-43	0.974035	0.932	0.352	1.24029e-38	2	AC006455.2
4.24797e-43	0.918544	0.909	0.279	1.3636e-38	2	GLRA4
4.3934e-43	0.843056	1	0.791	1.41028e-38	2	C19orf71
8.59202e-43	1.00868	0.977	0.689	2.75804e-38	2	SPATA12
9.54812e-43	0.868917	1	0.808	3.06495e-38	2	SPATA18
9.7327e-43	0.880275	1	0.855	3.1242e-38	2	TMEM31
1.1105e-42	0.96719	0.932	0.36	3.56471e-38	2	LOC100287704
1.15597e-42	0.880746	0.977	0.651	3.71067e-38	2	CCSER1
1.22766e-42	0.819042	1	0.849	3.94078e-38	2	TSSK2
1.36965e-42	0.823228	1	0.826	4.39658e-38	2	CXorf65
2.18968e-42	0.958829	0.977	0.727	7.02886e-38	2	CEP170P1
2.52015e-42	0.803492	1	0.922	8.0897e-38	2	C20orf141
2.71471e-42	0.958594	0.977	0.605	8.71423e-38	2	SLFNL1
3.05127e-42	0.84504	0.989	0.887	9.79457e-38	2	DNAJB8
3.16534e-42	0.91184	0.989	0.779	1.01608e-37	2	LINC00608
3.50149e-42	0.92069	0.989	0.817	1.12398e-37	2	SCP2D1
3.90791e-42	0.917476	0.989	0.782	1.25444e-37	2	CST13P
3.95509e-42	0.811419	0.989	0.837	1.26958e-37	2	AC003098.1
4.6846e-42	0.898084	0.932	0.355	1.50376e-37	2	RGS6
4.98055e-42	0.925421	0.966	0.43	1.59876e-37	2	AL049634.1
5.09282e-42	1.06007	0.966	0.645	1.63479e-37	2	AC011472.2
5.36023e-42	0.912628	0.977	0.727	1.72063e-37	2	ZNF683
6.58211e-42	0.876236	0.989	0.846	2.11286e-37	2	AC113189.2
6.77887e-42	0.832659	0.989	0.849	2.17602e-37	2	TP53TG5
1.08849e-41	0.881917	0.864	0.23	3.49406e-37	2	ARL2BPP3
1.15861e-41	0.836024	0.989	0.904	3.71914e-37	2	TSPAN16
1.2785e-41	0.946551	0.977	0.738	4.10399e-37	2	ADIG
1.46259e-41	0.921498	0.943	0.36	4.6949e-37	2	AC006254.1
1.59791e-41	0.847076	1	0.834	5.12928e-37	2	LPP
1.602e-41	0.981347	0.932	0.381	5.14241e-37	2	SLC25A5P1
2.08458e-41	0.876735	0.989	0.744	6.69151e-37	2	C3orf22
2.5732e-41	0.986829	0.955	0.526	8.25997e-37	2	PPP2R2B
2.68309e-41	0.894634	0.989	0.846	8.6127e-37	2	TEX37
2.69234e-41	0.807448	1	0.788	8.64241e-37	2	ZBTB20-AS1
2.90518e-41	0.949781	0.966	0.578	9.32563e-37	2	FAM71C
3.236e-41	0.896936	0.977	0.724	1.03876e-36	2	LOC105378712
3.27132e-41	0.864232	0.989	0.805	1.05009e-36	2	ACTL9
3.75191e-41	0.983027	0.989	0.631	1.20436e-36	2	MORN3
3.8162e-41	0.884168	0.977	0.651	1.225e-36	2	SLFNL1-AS1
4.0229e-41	1.00725	0.966	0.651	1.29135e-36	2	FBXO39
4.81983e-41	0.957703	0.966	0.608	1.54717e-36	2	FLJ40194
5.16625e-41	0.987219	0.966	0.57	1.65837e-36	2	TTLL2
5.42917e-41	0.924238	0.977	0.788	1.74276e-36	2	TEX44
6.42768e-41	0.890303	0.977	0.642	2.06329e-36	2	DRICH1
7.56973e-41	0.858738	0.989	0.849	2.42988e-36	2	TEX53
8.12041e-41	0.953221	0.977	0.773	2.60665e-36	2	FNDC8
9.75084e-41	0.86828	0.989	0.799	3.13002e-36	2	DGCR6
1.13687e-40	0.882937	0.966	0.576	3.64936e-36	2	EDRF1-AS1
1.17789e-40	0.820006	0.989	0.898	3.78104e-36	2	IQCF2
1.18392e-40	1.03076	0.966	0.657	3.80037e-36	2	LINCR-0001
1.25393e-40	0.809657	0.989	0.852	4.02511e-36	2	BANF2
1.37043e-40	0.82368	1	0.677	4.39907e-36	2	TENT5C
1.40542e-40	0.853963	0.989	0.703	4.51139e-36	2	AC092666.1
1.42704e-40	0.927897	0.966	0.578	4.58081e-36	2	LINC00535
1.48417e-40	0.82215	0.989	0.898	4.76417e-36	2	CABS1
1.53243e-40	1.0074	0.943	0.445	4.9191e-36	2	UBQLNL
1.55709e-40	0.873283	0.909	0.308	4.99826e-36	2	AL136164.2
1.83451e-40	0.977721	0.966	0.523	5.88879e-36	2	ODF3B
1.97707e-40	0.969441	0.955	0.587	6.34639e-36	2	LOC102723661
2.3469e-40	0.954047	0.955	0.512	7.53354e-36	2	LOC102467222
2.50747e-40	0.878149	0.875	0.267	8.04899e-36	2	AC005828.1
2.5607e-40	0.842537	1	0.654	8.21985e-36	2	LINC01539
2.61009e-40	0.903952	0.977	0.541	8.37838e-36	2	GRID2
2.7341e-40	0.816165	0.989	0.849	8.77647e-36	2	TEX26
2.81092e-40	0.819114	0.852	0.218	9.02304e-36	2	LINC02508
3.36726e-40	0.883974	0.977	0.823	1.08089e-35	2	NLE1
5.15098e-40	0.821835	0.989	0.733	1.65346e-35	2	ACE
5.25468e-40	0.825939	0.989	0.831	1.68675e-35	2	GABRG3-AS1
5.45122e-40	0.888866	0.966	0.564	1.74984e-35	2	AC106736.1
5.54748e-40	0.810325	0.977	0.767	1.78074e-35	2	C1QTNF3
5.95806e-40	0.892255	0.977	0.683	1.91254e-35	2	TUBA8
6.1941e-40	0.858998	0.966	0.802	1.98831e-35	2	SPATA3-AS1
6.36461e-40	0.8408	0.841	0.209	2.04304e-35	2	PRR7-AS1
7.21033e-40	0.958713	0.932	0.401	2.31452e-35	2	LINC01664
8.17264e-40	0.952273	0.943	0.483	2.62342e-35	2	AC015468.2
8.31485e-40	0.87534	0.898	0.311	2.66907e-35	2	AC098680.1
8.68357e-40	0.896959	0.977	0.613	2.78743e-35	2	LOC105370489
1.09863e-39	0.946996	0.955	0.578	3.52659e-35	2	TRIM42
1.12256e-39	0.828098	0.875	0.27	3.60342e-35	2	MCM8-AS1
1.13442e-39	0.857605	0.977	0.788	3.64149e-35	2	LINC01350
1.26887e-39	0.914936	0.864	0.244	4.07308e-35	2	AL033528.2
1.49439e-39	0.879616	0.966	0.674	4.79698e-35	2	AL365184.2
1.76928e-39	0.811119	0.966	0.703	5.6794e-35	2	RNF133
2.0296e-39	0.873262	0.977	0.75	6.515e-35	2	LINC02153
2.07624e-39	0.941471	0.955	0.654	6.66473e-35	2	CYP17A1
2.35092e-39	0.82408	0.977	0.762	7.54645e-35	2	PRM3
2.378e-39	0.871166	0.977	0.811	7.63338e-35	2	OTUB2
2.53417e-39	0.876764	0.977	0.695	8.13469e-35	2	AC008079.1
2.55982e-39	0.971622	0.932	0.43	8.21702e-35	2	AC090376.1
2.85781e-39	0.90804	0.955	0.578	9.17357e-35	2	ANKRD53
3.24439e-39	0.833865	0.977	0.75	1.04145e-34	2	LOC100505685
3.45379e-39	0.89478	0.943	0.427	1.10867e-34	2	LINC00326
3.67537e-39	0.822473	0.977	0.741	1.17979e-34	2	BPI
3.78015e-39	0.8338	0.83	0.224	1.21343e-34	2	LINC01939
4.04915e-39	0.884015	0.977	0.814	1.29978e-34	2	FAM187B
4.29506e-39	0.802336	0.989	0.823	1.37872e-34	2	SPANXD
4.66518e-39	0.888041	0.966	0.706	1.49752e-34	2	C1QTNF3-AMACR
4.92073e-39	0.916632	0.955	0.5	1.57955e-34	2	ZCCHC13
5.39157e-39	0.917104	0.966	0.712	1.7307e-34	2	GTF3C2-AS1
5.97597e-39	0.921481	0.909	0.366	1.91829e-34	2	AC013644.1
6.68018e-39	0.904041	0.966	0.701	2.14434e-34	2	LINC01655
8.43975e-39	0.921149	0.898	0.358	2.70916e-34	2	LINC01548
9.45879e-39	0.969673	0.955	0.544	3.03627e-34	2	ITIH4
1.11383e-38	0.897032	0.966	0.625	3.57538e-34	2	LINC00929
1.16963e-38	0.983584	0.932	0.413	3.75451e-34	2	AC007326.4
1.20303e-38	0.836353	0.966	0.744	3.86171e-34	2	AC004805.1
1.46786e-38	0.803288	0.875	0.276	4.71182e-34	2	LOC728095
1.59966e-38	0.924052	0.966	0.648	5.1349e-34	2	FAM71B
1.66066e-38	0.949784	0.955	0.602	5.33072e-34	2	STPG3
1.87591e-38	0.874618	0.966	0.683	6.02167e-34	2	AC006942.1
2.1895e-38	0.881593	0.966	0.68	7.02829e-34	2	NTRK3-AS1
2.21739e-38	1.01504	0.932	0.535	7.11782e-34	2	FUNDC2P2
2.31608e-38	0.920647	0.886	0.346	7.4346e-34	2	AC009119.3
2.99827e-38	0.851475	0.943	0.448	9.62443e-34	2	ANKEF1
3.25109e-38	0.89056	0.955	0.692	1.0436e-33	2	IQCF6
3.48557e-38	0.847854	0.898	0.317	1.11887e-33	2	RUNX2-AS1
3.83707e-38	0.829961	0.955	0.605	1.2317e-33	2	PLCE1-AS2
3.89369e-38	0.88342	0.977	0.625	1.24987e-33	2	SPANXC
4.05492e-38	0.95503	0.932	0.43	1.30163e-33	2	TSPAN1
4.06593e-38	0.832731	0.989	0.797	1.30516e-33	2	AC022167.2
4.20754e-38	0.842735	0.966	0.805	1.35062e-33	2	TBX18-AS1
4.36207e-38	0.900814	0.932	0.564	1.40023e-33	2	PDSS1P2
4.39418e-38	0.920006	0.955	0.637	1.41053e-33	2	STPG3-AS1
4.41451e-38	0.851578	0.932	0.41	1.41706e-33	2	LINC00901
4.57752e-38	0.809517	0.989	0.817	1.46938e-33	2	AC009487.1
4.79273e-38	0.869005	0.955	0.581	1.53847e-33	2	LINC01255
5.24659e-38	0.909473	0.875	0.311	1.68415e-33	2	AP001010.1
5.43081e-38	0.939922	0.966	0.602	1.74329e-33	2	LRRC8C-DT
6.59277e-38	0.912171	0.898	0.352	2.11628e-33	2	AC080162.1
7.71904e-38	0.805866	0.977	0.724	2.47781e-33	2	ETNK2
7.92952e-38	0.855596	0.977	0.756	2.54538e-33	2	CCDC37-DT
8.56815e-38	0.810473	0.977	0.747	2.75038e-33	2	AL355357.1
1.19373e-37	0.853533	0.955	0.625	3.83189e-33	2	LINC01620
1.27606e-37	0.833971	0.943	0.535	4.09616e-33	2	LINC01837
1.3679e-37	0.893462	1	0.776	4.39096e-33	2	CCDC200
1.42887e-37	0.886691	0.909	0.413	4.58668e-33	2	KLK5
1.54911e-37	0.818989	0.977	0.814	4.97263e-33	2	AL358214.1
1.67954e-37	0.857659	0.841	0.247	5.39132e-33	2	TMEM215
1.96079e-37	0.87543	0.932	0.503	6.29412e-33	2	FAM71D
2.12409e-37	0.883973	0.943	0.509	6.81833e-33	2	LINC01364
2.18399e-37	0.807247	0.955	0.794	7.01061e-33	2	SPERT
2.44377e-37	0.844736	0.966	0.558	7.84449e-33	2	GSTT4
2.53357e-37	0.828958	0.966	0.73	8.13274e-33	2	SPATA32
2.55319e-37	0.819414	0.932	0.416	8.19573e-33	2	LOC101927989
2.64313e-37	0.924848	0.92	0.462	8.48443e-33	2	LOC101929989
2.73795e-37	0.890255	0.955	0.689	8.78881e-33	2	OSBPL10
2.79675e-37	0.875733	0.943	0.605	8.97758e-33	2	LPAR6
2.8117e-37	0.807901	0.966	0.631	9.02557e-33	2	INPP4B
2.81271e-37	0.850705	0.92	0.451	9.0288e-33	2	RFPL3
2.83768e-37	0.847862	0.966	0.727	9.10896e-33	2	AL359853.3
2.83778e-37	0.93294	0.92	0.491	9.10926e-33	2	AL136988.2
2.85387e-37	0.844276	0.864	0.27	9.16093e-33	2	CNTFR-AS1
2.90076e-37	0.861098	0.864	0.299	9.31145e-33	2	VEPH1
3.21874e-37	0.868756	0.977	0.634	1.03321e-32	2	AL929554.1
3.80093e-37	0.905542	0.932	0.503	1.2201e-32	2	AL589935.1
4.05296e-37	0.880902	0.886	0.355	1.301e-32	2	AL161937.2
4.76288e-37	0.902135	0.955	0.593	1.52889e-32	2	LINC02024
5.20716e-37	0.875049	0.886	0.387	1.6715e-32	2	AC110011.1
5.49312e-37	0.839461	0.92	0.451	1.76329e-32	2	AC007179.2
5.74147e-37	0.861894	0.932	0.494	1.84301e-32	2	FCRL3
5.86051e-37	0.840548	0.864	0.308	1.88122e-32	2	CCDC188
6.91358e-37	1.01704	0.932	0.564	2.21926e-32	2	SPPL2C
6.9948e-37	0.817615	0.864	0.297	2.24533e-32	2	AL356276.1
7.10055e-37	0.909535	0.943	0.584	2.27928e-32	2	GUCA1A
7.59984e-37	0.811778	0.955	0.808	2.43955e-32	2	PRH1-PRR4
7.63617e-37	0.834855	0.977	0.648	2.45121e-32	2	LOC101929628
7.97375e-37	0.900048	0.92	0.509	2.55957e-32	2	AC083800.1
8.30984e-37	0.876126	0.955	0.573	2.66746e-32	2	LOXHD1
9.41751e-37	0.86271	0.943	0.593	3.02302e-32	2	LOC101927227
1.02256e-36	0.836384	0.943	0.613	3.28243e-32	2	CSNKA2IP
1.03374e-36	0.957753	0.943	0.5	3.3183e-32	2	AC010177.1
1.04465e-36	0.900002	0.932	0.465	3.35332e-32	2	KCNIP2-AS1
1.13576e-36	0.834969	0.886	0.328	3.64578e-32	2	DNAJB8-AS1
1.16715e-36	0.906226	0.955	0.488	3.74655e-32	2	SPEM2
1.17768e-36	0.853512	0.955	0.59	3.78035e-32	2	LINC00710
1.18599e-36	0.906731	0.955	0.733	3.80703e-32	2	LINC02314
1.28978e-36	0.875373	0.943	0.526	4.1402e-32	2	LDLRAD4
1.39805e-36	0.81066	0.875	0.308	4.48775e-32	2	ACSS1
1.42257e-36	0.817201	0.955	0.712	4.56644e-32	2	LINC02165
1.59286e-36	0.801719	0.977	0.82	5.11309e-32	2	DDI1
1.60693e-36	0.917183	0.92	0.526	5.15825e-32	2	AC022196.1
1.98458e-36	0.876884	0.966	0.57	6.3705e-32	2	MACROD2-AS1
2.02867e-36	0.968273	0.886	0.36	6.51203e-32	2	AC079360.1
2.14552e-36	0.894448	0.932	0.483	6.88712e-32	2	RETREG1
2.46607e-36	0.80199	0.977	0.762	7.91609e-32	2	ST6GALNAC2
2.62184e-36	0.853642	0.932	0.497	8.41609e-32	2	CEP295NL
2.66628e-36	0.885453	0.932	0.445	8.55877e-32	2	AC022679.1
2.69642e-36	0.942752	0.932	0.616	8.65551e-32	2	SLIT1-AS1
2.74516e-36	0.810824	0.977	0.578	8.81196e-32	2	HK1
2.79436e-36	0.905309	0.909	0.509	8.9699e-32	2	CBY3
3.04213e-36	0.876964	0.955	0.541	9.76524e-32	2	DHRS3
3.09019e-36	0.908167	0.909	0.442	9.91951e-32	2	PRKCE
3.28056e-36	0.810414	0.977	0.721	1.05306e-31	2	PEX26
3.6424e-36	0.969193	0.852	0.308	1.16921e-31	2	AC209005.1
4.1847e-36	0.870432	0.966	0.634	1.34329e-31	2	SRD5A3-AS1
4.57879e-36	0.928275	0.932	0.517	1.46979e-31	2	HPD
4.79594e-36	0.955288	0.886	0.378	1.5395e-31	2	AC117422.1
4.92891e-36	0.840922	0.841	0.253	1.58218e-31	2	HBZ
5.4334e-36	0.805997	0.943	0.471	1.74412e-31	2	TEX45
5.5579e-36	0.856696	0.92	0.462	1.78408e-31	2	LINC02411
5.76372e-36	0.910159	0.92	0.485	1.85015e-31	2	AL096814.1
5.95247e-36	0.84988	0.955	0.759	1.91074e-31	2	C10orf120
6.61274e-36	0.819219	0.977	0.712	2.12269e-31	2	BCL2L14
6.63269e-36	0.859791	0.875	0.358	2.12909e-31	2	NEURL1-AS1
6.65097e-36	0.83448	0.955	0.648	2.13496e-31	2	FO393401.2
7.17615e-36	0.843655	0.966	0.834	2.30355e-31	2	HEMGN
8.37715e-36	0.851094	0.966	0.66	2.68906e-31	2	AC097375.2
1.05637e-35	0.837222	0.864	0.32	3.39094e-31	2	AL359853.1
1.06537e-35	0.809278	0.909	0.366	3.41985e-31	2	TRIML1
1.11844e-35	0.830088	0.989	0.695	3.59018e-31	2	LINC01304
1.3476e-35	0.878313	0.932	0.494	4.32579e-31	2	LINC01989
1.46114e-35	0.828587	0.955	0.692	4.69025e-31	2	TNFAIP8L1
1.52598e-35	0.8547	0.909	0.422	4.89839e-31	2	LINC00448
1.72165e-35	0.826065	0.886	0.366	5.52651e-31	2	PHF2
1.96303e-35	0.863735	0.943	0.578	6.30132e-31	2	AL358215.2
1.99488e-35	0.847002	0.943	0.593	6.40356e-31	2	SPZ1
2.1406e-35	0.801798	0.966	0.634	6.87133e-31	2	TEKT3
2.39073e-35	0.854327	0.886	0.363	7.67423e-31	2	HMGB3P22
2.47245e-35	0.852468	0.989	0.669	7.93655e-31	2	HIP1
2.70265e-35	0.811009	0.932	0.465	8.67551e-31	2	MICAL2
2.93098e-35	0.88301	0.898	0.422	9.40846e-31	2	LOC105375095
3.28286e-35	0.821551	0.955	0.724	1.0538e-30	2	LOC105370145
3.29346e-35	0.865996	0.886	0.378	1.0572e-30	2	AC092155.1
3.46678e-35	0.816074	0.92	0.427	1.11284e-30	2	AL158837.1
3.63506e-35	0.803369	0.955	0.677	1.16685e-30	2	C20orf173
3.85817e-35	0.80418	0.966	0.744	1.23847e-30	2	METAP1
4.0267e-35	0.843187	0.864	0.323	1.29257e-30	2	LINC01709
4.67145e-35	0.823472	0.943	0.689	1.49954e-30	2	MIR7515HG
5.11701e-35	0.855261	0.932	0.547	1.64256e-30	2	KCNIP2
5.33627e-35	0.906832	0.909	0.503	1.71294e-30	2	C11orf42
5.61569e-35	0.898856	0.898	0.451	1.80264e-30	2	AL035078.3
5.62314e-35	0.830597	0.943	0.654	1.80503e-30	2	PRRX2-AS1
6.9785e-35	0.811053	0.886	0.363	2.2401e-30	2	UGT1A1
6.9785e-35	0.810744	0.886	0.363	2.2401e-30	2	UGT1A10
7.03085e-35	0.877717	0.943	0.642	2.2569e-30	2	PRSS37
8.13319e-35	0.819584	0.875	0.349	2.61075e-30	2	LINC02466
1.07554e-34	0.886937	0.932	0.555	3.45249e-30	2	CDKN1C
1.21973e-34	0.816389	0.898	0.404	3.91534e-30	2	LINC02053
1.29199e-34	0.842024	0.932	0.567	4.14728e-30	2	AC024619.1
1.30521e-34	0.860216	0.909	0.535	4.18973e-30	2	TMEM191C
1.37174e-34	0.815857	0.864	0.311	4.40329e-30	2	AL139289.1
1.7926e-34	0.877909	0.943	0.61	5.75425e-30	2	TSSK3
1.85999e-34	0.831738	0.955	0.765	5.97056e-30	2	AKAP1
2.08298e-34	0.836434	0.886	0.407	6.68636e-30	2	CFAP44-AS1
3.046e-34	0.887366	0.886	0.427	9.77765e-30	2	LOC100288123
3.06307e-34	0.824744	0.875	0.384	9.83246e-30	2	LINC01523
3.92076e-34	0.848751	0.943	0.506	1.25856e-29	2	SLC38A7
5.51496e-34	0.813883	0.943	0.581	1.7703e-29	2	BCAT1
6.3734e-34	0.842379	0.932	0.657	2.04586e-29	2	LINC01667
6.42514e-34	0.841925	0.966	0.674	2.06247e-29	2	UBE2DNL
6.83742e-34	0.833669	0.966	0.613	2.19481e-29	2	RAB11FIP4
7.94294e-34	1.0042	0.886	0.468	2.54968e-29	2	LINC01227
8.51572e-34	0.809774	0.943	0.77	2.73355e-29	2	HYPM
8.69087e-34	0.936217	0.909	0.48	2.78977e-29	2	TUBA4A
9.34504e-34	0.913968	0.807	0.282	2.99976e-29	2	AL133371.1
9.98569e-34	0.883768	0.955	0.791	3.20541e-29	2	TEX36-AS1
1.24842e-33	0.82407	0.966	0.602	4.00743e-29	2	C2orf70
1.25073e-33	0.815196	0.807	0.265	4.01483e-29	2	ARHGAP26-AS1
1.28723e-33	0.814175	0.795	0.238	4.13199e-29	2	CSNK1G2-AS1
1.6029e-33	0.88161	0.92	0.468	5.1453e-29	2	LINC00293
1.61431e-33	-0.85064	0.773	0.985	5.18195e-29	2	CCT8
2.79993e-33	0.823684	0.875	0.41	8.98776e-29	2	LOC105375671
2.89622e-33	0.87566	0.898	0.416	9.29686e-29	2	AC007557.2
4.20678e-33	0.842439	0.886	0.395	1.35037e-28	2	AP006284.1
5.8947e-33	0.830881	0.92	0.567	1.8922e-28	2	CTNNA3
7.7064e-33	0.823318	0.92	0.608	2.47376e-28	2	TEKT5
1.04783e-32	0.820637	0.909	0.471	3.36354e-28	2	OGFRL1
1.91361e-32	0.802901	0.909	0.485	6.14269e-28	2	LINC02112
2.30996e-32	0.869925	0.875	0.398	7.41498e-28	2	LOC101929464
2.37964e-32	-0.867315	0.705	0.971	7.63865e-28	2	MT-TN
2.90433e-32	0.950497	0.92	0.552	9.32289e-28	2	LOC102724551
2.99534e-32	0.864645	0.875	0.453	9.61504e-28	2	CST8
4.27359e-32	0.828926	0.943	0.701	1.37182e-27	2	PRSS58
4.28761e-32	-0.852598	0.761	0.953	1.37632e-27	2	VAPA
4.72162e-32	0.814323	0.932	0.509	1.51564e-27	2	CDRT4
5.10436e-32	0.892393	0.886	0.419	1.6385e-27	2	PAQR7
5.83355e-32	0.804825	0.886	0.491	1.87257e-27	2	AC025040.1
7.38343e-32	0.807041	0.909	0.561	2.37008e-27	2	AL831784.1
7.93503e-32	0.828922	0.898	0.529	2.54714e-27	2	LINC01820
7.94426e-32	0.805715	0.909	0.509	2.55011e-27	2	C5orf60
1.01961e-31	0.876117	0.875	0.422	3.27295e-27	2	C16orf78
1.07148e-31	0.814656	0.818	0.297	3.43945e-27	2	LOC102723536
2.37073e-31	0.818215	0.92	0.616	7.61003e-27	2	AC079779.3
2.43741e-31	0.802764	0.909	0.41	7.82408e-27	2	AL355390.2
4.34223e-31	0.889844	0.886	0.573	1.39386e-26	2	CCDC185
4.50366e-31	0.82228	0.864	0.43	1.44568e-26	2	C4orf36
6.42348e-31	0.803611	0.864	0.448	2.06194e-26	2	OSBPL10-AS1
8.41719e-31	0.845949	0.864	0.387	2.70192e-26	2	ACP4
9.64775e-31	0.808951	0.909	0.616	3.09693e-26	2	PFN3
9.95767e-31	-0.805465	0.727	0.945	3.19641e-26	2	PPA1
1.4371e-30	0.901839	0.875	0.497	4.61308e-26	2	FGF14-AS1
1.43817e-30	-0.801729	0.648	0.924	4.61652e-26	2	IMPACT
1.61564e-30	-0.823349	0.602	0.93	5.18619e-26	2	YTHDF2
2.32608e-30	0.827877	0.943	0.515	7.46671e-26	2	ODF3L2
2.59287e-30	0.821225	0.83	0.378	8.32312e-26	2	NUP210P1
3.18136e-30	0.916575	0.909	0.581	1.02122e-25	2	AC073111.1
4.46419e-30	-0.800819	0.83	0.962	1.43301e-25	2	PPIG
6.10649e-30	-0.859334	0.591	0.924	1.96018e-25	2	HSPE1-MOB4
8.94156e-30	-0.852768	0.739	0.959	2.87024e-25	2	PSMD1
1.38058e-29	-0.846166	0.659	0.933	4.43167e-25	2	RNMT
2.69585e-29	0.805841	0.841	0.39	8.65369e-25	2	GAPDHP72
5.85272e-29	0.903007	0.886	0.468	1.87872e-24	2	CDHR2
6.24504e-29	-0.808874	0.682	0.939	2.00466e-24	2	SLF1
8.44039e-29	-0.826872	0.841	0.985	2.70937e-24	2	BTG3
3.43743e-28	-0.812223	0.58	0.904	1.10342e-23	2	MIR1244-1
4.22451e-28	-0.821443	0.716	0.945	1.35607e-23	2	VAMP2
4.42915e-28	0.822716	0.841	0.401	1.42176e-23	2	LOC101929217
1.48155e-27	0.826209	0.875	0.456	4.75579e-23	2	LASP1
1.52636e-27	-0.842379	0.773	0.959	4.8996e-23	2	SNX6
1.79583e-27	0.804251	0.795	0.343	5.76462e-23	2	AC007114.2
1.84732e-27	-0.807932	0.761	0.953	5.92989e-23	2	HLTF
2.16744e-27	-0.80484	0.705	0.939	6.95749e-23	2	MIS18BP1
8.5749e-27	-0.838809	0.784	0.965	2.75254e-22	2	NAE1
1.40912e-26	-0.8828	0.523	0.91	4.52328e-22	2	AC092447.7
1.94629e-26	-0.813759	0.557	0.89	6.2476e-22	2	HECTD1
6.05535e-26	-0.829606	0.33	0.811	1.94377e-21	2	NOC3L
2.0523e-25	-0.811475	0.705	0.948	6.58787e-21	2	APLP2
3.24842e-25	-0.82903	0.773	0.968	1.04274e-20	2	SSB
3.30837e-25	0.821575	0.864	0.506	1.06199e-20	2	CELF5
4.48807e-25	-0.809924	0.591	0.869	1.44067e-20	2	CHMP2B
1.11391e-24	0.821196	0.852	0.517	3.57566e-20	2	AC010649.1
2.13093e-30	1.39039	0.961	0.438	6.84028e-26	3	TEX19
1.24042e-29	1.19758	0.98	0.64	3.98174e-25	3	DPH7
2.62724e-29	1.17357	0.961	0.459	8.43344e-25	3	FAM9C
8.66123e-29	1.0415	0.98	0.465	2.78025e-24	3	CDC6
9.64906e-28	0.91361	1	0.879	3.09735e-23	3	SCML1
2.63658e-27	1.03681	0.98	0.514	8.46343e-23	3	BEND2
2.86847e-27	0.999699	0.961	0.512	9.20778e-23	3	MAGEA9B
7.4429e-27	0.826274	1	0.785	2.38917e-22	3	VCX3B
9.62471e-27	1.03076	1	0.656	3.08953e-22	3	PRAP1
1.37078e-26	1.0004	0.98	0.848	4.40021e-22	3	CLSPN
4.67897e-26	0.833369	1	0.832	1.50195e-21	3	PRIM1
6.33683e-26	0.905562	1	0.748	2.03412e-21	3	ZNF511-PRAP1
2.87044e-25	0.95264	0.902	0.325	9.21411e-21	3	MAGEA10
4.53813e-25	0.858597	0.98	0.829	1.45674e-20	3	GINS2
6.64505e-25	0.93203	0.98	0.58	2.13306e-20	3	TAOK3
7.17077e-25	0.83981	1	0.898	2.30182e-20	3	PAGE1
4.51084e-24	0.973041	0.98	0.556	1.44798e-19	3	SSX3
2.9095e-23	1.02897	0.863	0.381	9.33948e-19	3	KIF1A
4.12629e-23	0.804167	1	0.793	1.32454e-18	3	CHGB
6.54728e-23	0.951001	0.922	0.525	2.10168e-18	3	RNF212B
7.03271e-23	0.800198	0.98	0.661	2.2575e-18	3	HIF1A
8.2972e-23	0.891082	0.941	0.619	2.6634e-18	3	MSH5-SAPCD1
1.26805e-22	0.904029	0.922	0.559	4.07043e-18	3	MSH5
1.66248e-22	0.987473	0.804	0.27	5.33656e-18	3	AL772284.2
3.24475e-22	0.874902	0.922	0.593	1.04157e-17	3	GGCT
1.11384e-21	0.85192	0.961	0.48	3.57544e-17	3	GAGE12H
1.17807e-21	0.837159	0.961	0.682	3.78159e-17	3	ESCO2
7.48839e-21	0.916678	0.784	0.281	2.40377e-16	3	OTUD6A
2.43853e-20	0.878031	0.902	0.444	7.82767e-16	3	PGRMC1
2.72487e-20	0.89284	0.902	0.588	8.74682e-16	3	FAM9B
1.09513e-19	0.810537	0.882	0.409	3.51537e-15	3	SSX1
3.87867e-19	0.853947	0.882	0.491	1.24505e-14	3	AP1S2
4.72914e-19	0.818734	0.902	0.47	1.51805e-14	3	FBXO47
5.23557e-19	0.927869	0.863	0.504	1.68062e-14	3	LPCAT2
5.80708e-19	0.85434	0.843	0.433	1.86407e-14	3	PDHA1
5.95505e-19	0.909742	0.863	0.462	1.91157e-14	3	LOC102724601
6.00165e-19	0.934892	0.784	0.333	1.92653e-14	3	AC007336.1
1.15057e-18	0.89781	0.961	0.814	3.69332e-14	3	RAD51AP2
1.58802e-18	0.83722	0.765	0.278	5.09755e-14	3	CT47B1
7.36791e-18	0.809973	0.804	0.352	2.3651e-13	3	JADE3
1.01298e-17	0.894504	0.745	0.291	3.25167e-13	3	FBXO5
1.32678e-17	0.829246	0.882	0.517	4.25896e-13	3	PEG10
1.57616e-17	0.872631	0.824	0.415	5.05947e-13	3	C19orf57
6.20044e-17	0.814274	0.725	0.273	1.99034e-12	3	CCNB3
2.29187e-11	0.821337	0.686	0.412	7.35689e-07	3	PRSS38
2.48374e-26	0.834513	0.98	0.522	7.9728e-22	4	KLB
6.50968e-26	0.818106	0.98	0.501	2.08961e-21	4	AC093326.2
1.96501e-21	0.811127	0.959	0.535	6.30768e-17	4	POM121L12
4.69706e-20	-0.835972	0.755	0.945	1.50776e-15	4	ZNF280B
6.64805e-36	0.889302	0.923	0.155	2.13402e-31	5	AC087273.2
5.19796e-32	0.886788	0.949	0.198	1.66855e-27	5	AL391645.1
3.89629e-31	0.82974	0.897	0.17	1.25071e-26	5	MLIP-AS1
6.00577e-30	0.834479	0.949	0.219	1.92785e-25	5	AP001425.1
1.46238e-28	0.964978	1	0.351	4.69423e-24	5	H1FOO
1.78768e-26	0.870435	1	0.366	5.73845e-22	5	LOC101929570
1.53325e-25	0.913629	1	0.392	4.92173e-21	5	LINC02502
1.06939e-23	0.963123	0.974	0.458	3.43275e-19	5	LINC01351
1.31194e-23	0.807114	1	0.425	4.21132e-19	5	CDH18
3.15537e-23	0.811119	0.923	0.316	1.01287e-18	5	LINC01755
4.46572e-23	0.833265	1	0.496	1.4335e-18	5	FAM183BP
6.64668e-23	0.836973	0.974	0.455	2.13358e-18	5	OLFML2B
6.77787e-23	0.90584	0.974	0.466	2.1757e-18	5	LOC102724434
7.42888e-23	0.88178	1	0.557	2.38467e-18	5	C4orf17
1.01782e-22	0.805752	1	0.42	3.26722e-18	5	LOC101929006
1.13556e-22	0.803435	0.974	0.481	3.64516e-18	5	LRRC39
3.22223e-22	0.809499	0.949	0.392	1.03434e-17	5	AC006557.1
8.54367e-22	0.834748	1	0.667	2.74252e-17	5	ARMH2
9.36518e-22	0.856679	0.949	0.399	3.00622e-17	5	DPP10-AS3
9.81687e-22	0.808389	1	0.537	3.15121e-17	5	ODF3L1
1.01015e-21	0.814322	1	0.588	3.24257e-17	5	LINC01938
1.0801e-21	0.907063	1	0.674	3.46713e-17	5	GOLGA6L2
1.37094e-21	0.812921	0.974	0.443	4.40071e-17	5	XKR3
2.21986e-21	0.818382	0.949	0.389	7.12575e-17	5	LINC01628
2.97395e-21	0.819128	1	0.679	9.54637e-17	5	AL512428.1
3.793e-21	0.81394	0.974	0.458	1.21755e-16	5	GOT1L1
5.68087e-21	0.822314	0.974	0.412	1.82356e-16	5	ABRA
1.44108e-20	0.816371	0.923	0.397	4.62587e-16	5	AC007314.1
6.08605e-20	0.853448	0.974	0.644	1.95362e-15	5	FAM24A
6.94306e-19	0.807611	0.923	0.489	2.22872e-14	5	BRINP3
1.69889e-15	-0.800509	0.974	0.952	5.45342e-11	5	CBX1
6.37885e-14	-0.832937	0.692	0.911	2.04761e-09	5	MIS18BP1
8.05298e-12	-0.800891	0.872	0.934	2.58501e-07	5	SSB
1.75193e-11	-0.853687	0.846	0.924	5.62369e-07	5	BCAP31
4.85826e-11	-0.836122	0.692	0.845	1.5595e-06	5	AC092447.7
